# Supplementary material for: Notch signaling governs the expression of glypican Dally to define the stem cell niche
Source: Oxford University Press journal article supplement (doi:10.1242/bio.047696), 2019-01-01
Supplement: bio047696supp.pdf [file bio047696supp.pdf]

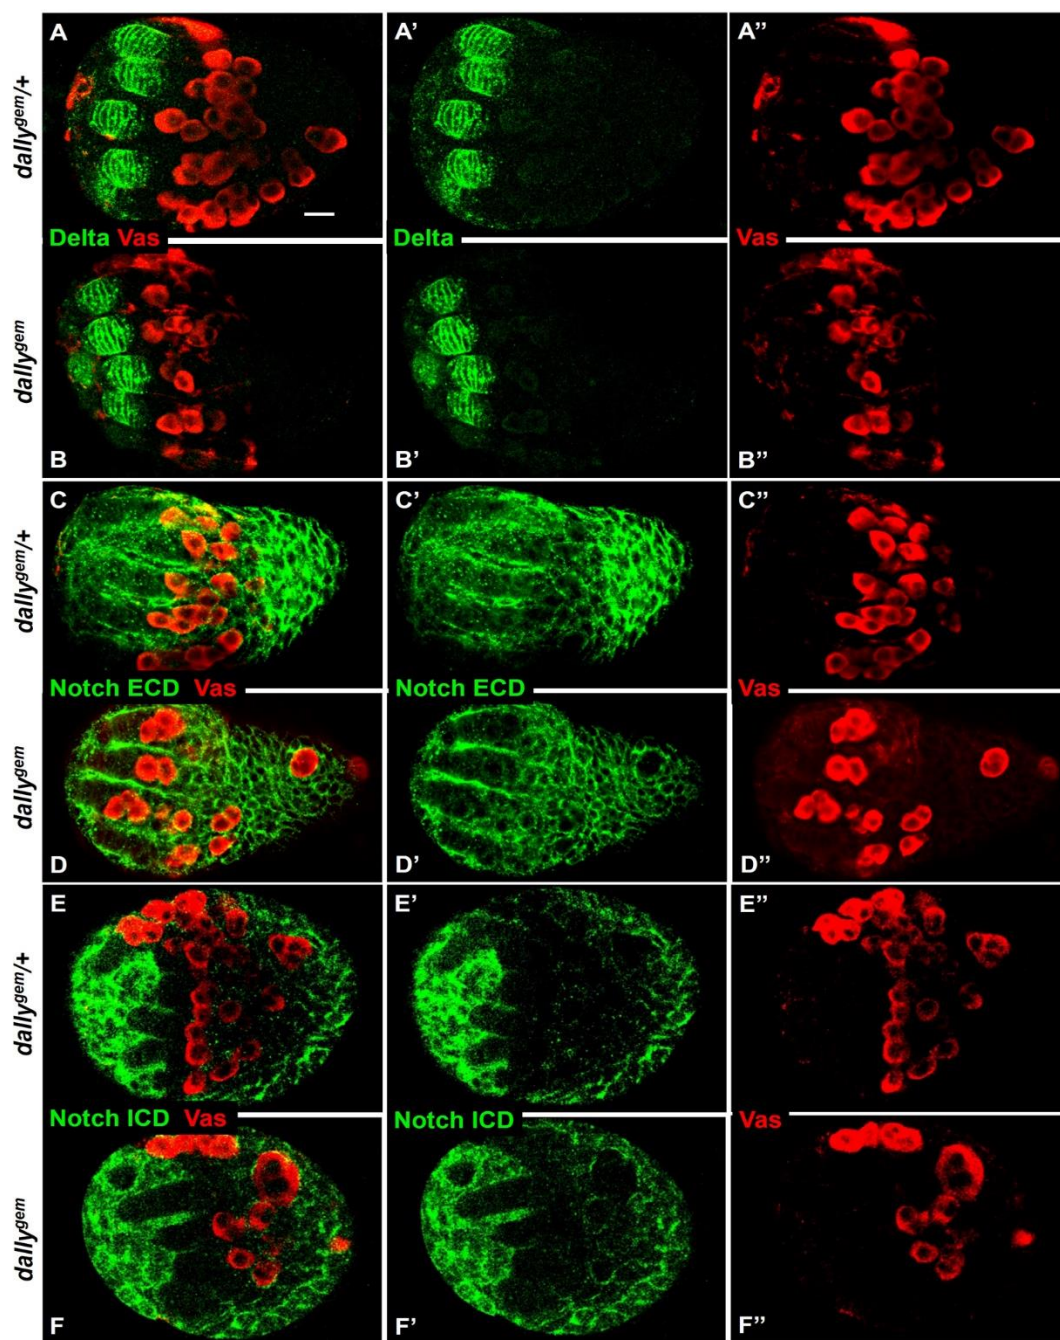

**Fig S1. Immunostaining of Notch pathway components showed no obvious change in ovarian GSC niche of *dally* mutant.**

Early pupal ovaries are shown. (A, C and E) Genotype: *dally<sup>gem/+</sup>*. (B, D and F) Vas-positive germ cells decreased in *dally* mutant (*dally<sup>gem</sup>*) ovary. (A and B) Delta, one of the Notch pathway ligands, is expressed in the terminal filament. (C and D) The pattern of Notch ECD (antibody against EGF-like repeats #12-20 in the extracellular domain of Notch). (E and F) The pattern of Notch ICD (antibody against Notch intracellular domain, a.a. 1791-2504). Bar, 10µm.



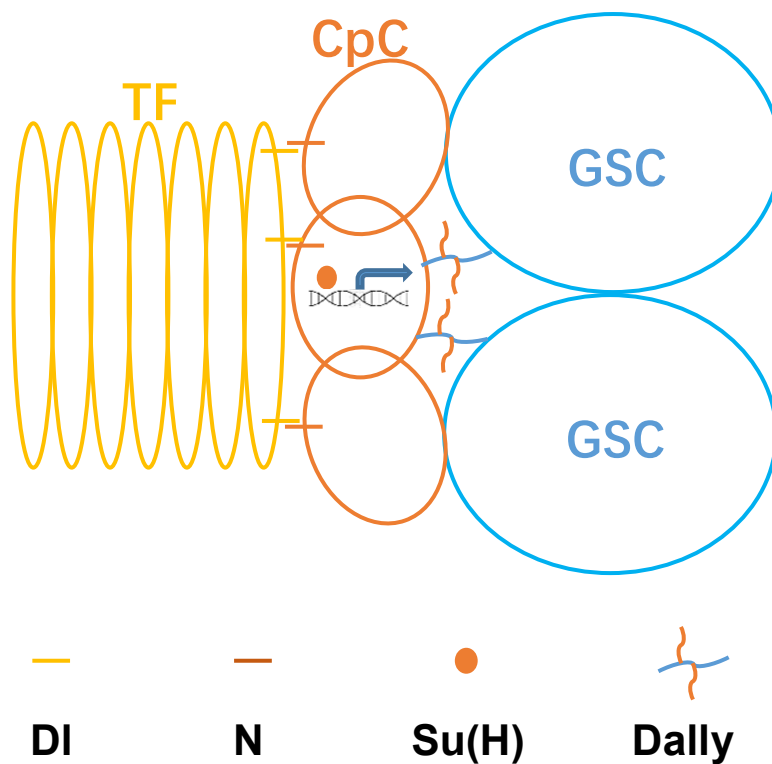

**Fig S3. Schematic model of Notch signaling and Dally expression in the ovarian stem cell niche.**

TF, terminal filament; CpC, cap cell; GSC, germline stem cell.
